# Supplementary material for: “What We Know and What We Do Not Know about Evolutionary Genetic Adaptation to High Altitude Hypoxia in Andean Aymaras”
Source: MDPI journal article supplement (doi:10.3390/genes14030640), 2023-03-03
Supplement: s1 [file s1]

**Supplementary Table S1: Amplification and SNE primers *EPAS1*/HIF-2 $\alpha$  region of Chromosome 2.**

| <b>Target</b> | <b>Forward Primer</b>       | <b>Reverse primer</b>       | <b>SNE primer</b>                                          |
|---------------|-----------------------------|-----------------------------|------------------------------------------------------------|
| rs113305133   | TATGCAAGGTT<br>AGTG         | CATGCTATTCCAA<br>GG TTCCCC  | T(7)GCCCCCTTACCTTCACCCC                                    |
| rs149306391   | GAGTATTCGCC<br>TAGG         | TCACTGTTCCCCTT<br>TC ACAGAT | AGATTGTTATTGTCATTGTTCTTCT<br>TT                            |
| rs188801636   | AAAGGCCTTAT<br>CCTCT AGCCTG | ACATCATTTCTCCA<br>GA AGCCTA | TACATCATTTCTCCAGAAGCCTATA<br>TT TAATATAA                   |
| rs61151542    | TCCCGTTAATT<br>ACAG         | AACTCAGATTTC<br>GT GCCTTCG  | T(14)CCTTGTGTTTTCCTCAAATACT<br>A CAT                       |
| rs77111769    | TTTGACCTTCC<br>CCATT        | CAGTTCTGGGCTG<br>TA TTATGCC | T(23)CCCTTCTTAGGCAAATAATGG                                 |
| rs373417600   | AGGATGAAAA<br>CGCTC         | ACTCTGTCTCTCCT<br>GT TAAGCC | ATAAGGTTTAGTTTGTTCCTT<br>AC<br>GTAAGTGGCTTTTAATAATGTGCCTT  |
| rs150877473   | GAGTCCCAGGT<br>GTAG GGTAAC  | GGGCAGTTGTTGTA<br>G ACTTCA  | CGGCTCCATGTCTGACCCTTCCAC<br>GC CTGT                        |
| rs142764723   | AGAAAGCTTGT<br>ACAG         | GTTTTCTCTGTGCT<br>GT TCTTGC | GAATCATGGGCTTGGGTTTTTCTT<br>GT<br>TTTGTCTTTCGCTAGTGAATAAGT |
| rs117813469   | AACCTGGACTC<br>AGGA         | CACATCTCTCCTT<br>CC ATCGC   | TGTCCTGGCCCTCGCT                                           |
| rs13005507    | GTTGGGCCCA<br>GAGTT GATCT   | AGATGGAGGGGAT<br>G CTTTGATT | TGTTGATCTGCTGACCCACTT                                      |
