# Supplementary material for: “What We Know and What We Do Not Know about Evolutionary Genetic Adaptation to High Altitude Hypoxia in Andean Aymaras”
Source: MDPI journal article supplement (doi:10.3390/genes14030640), 2023-03-03
Supplement: s1 [file s1]

### BRINP3 rs11578671 Genotype

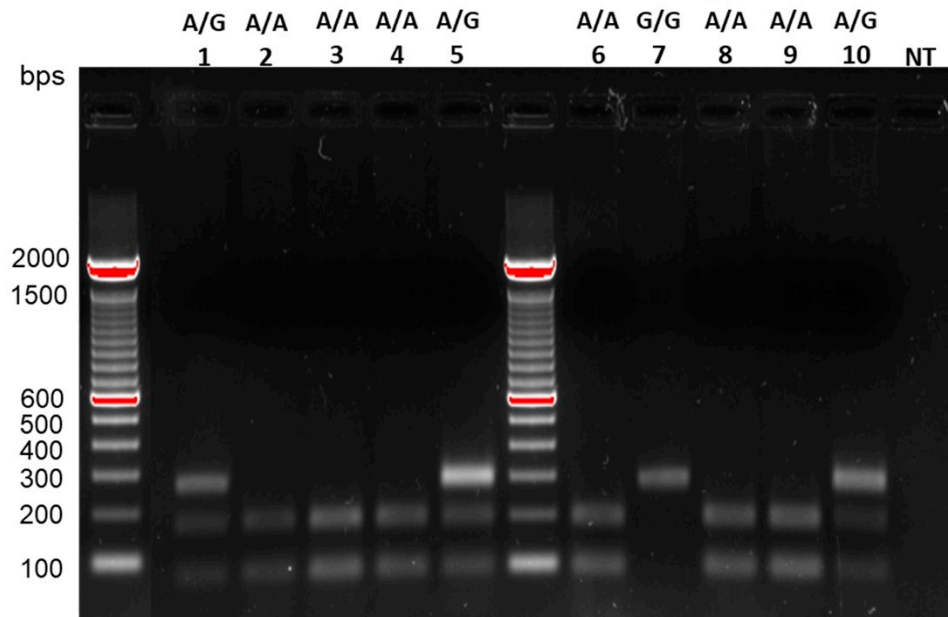

| Genotype | Expected size |
|----------|---------------|
| A/A      | 99/200        |
| A/G      | 299/99/200    |
| G/G      | 299           |

### TBX5 rs10744822 Genotyping

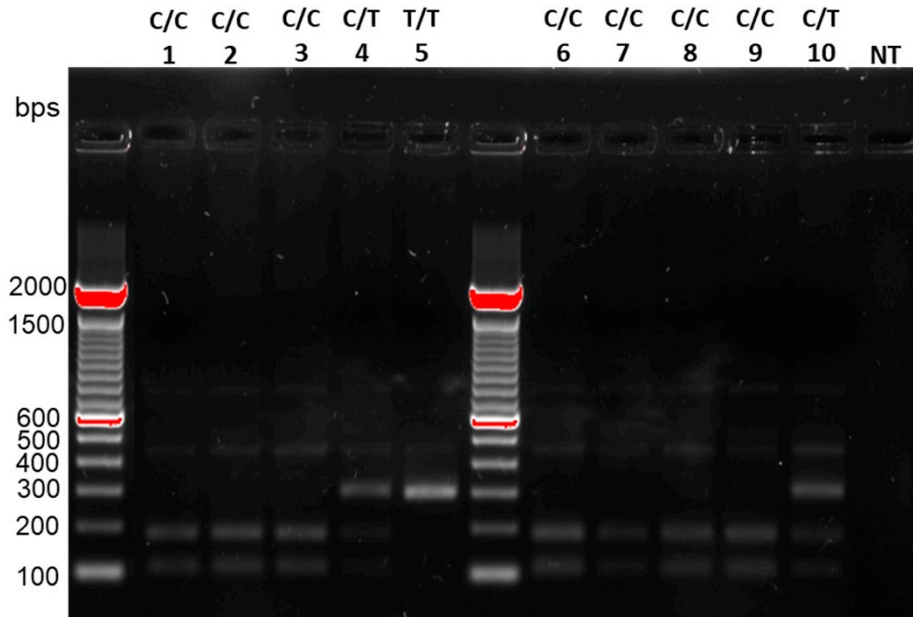

| Genotype | Expected size |
|----------|---------------|
| C/C      | 114/180       |
| C/T      | 294/180/114   |
| T/T      | 294           |

**Supplementary figure S1. Example of gel image for BRINP3 (rs11578671) and TBX5 (rs10744822) genotyping assay using restriction enzymes.**

Details of method are described in Methods and materials in the manuscript. NT: no template control
